# Supplementary material for: Individual and Population Level Effects of Partner Notification for Chlamydia trachomatis
Source: PubMed Central journal article supplement (PMC3520891; doi:10.1371/journal.pone.0051438), 2012-12-12

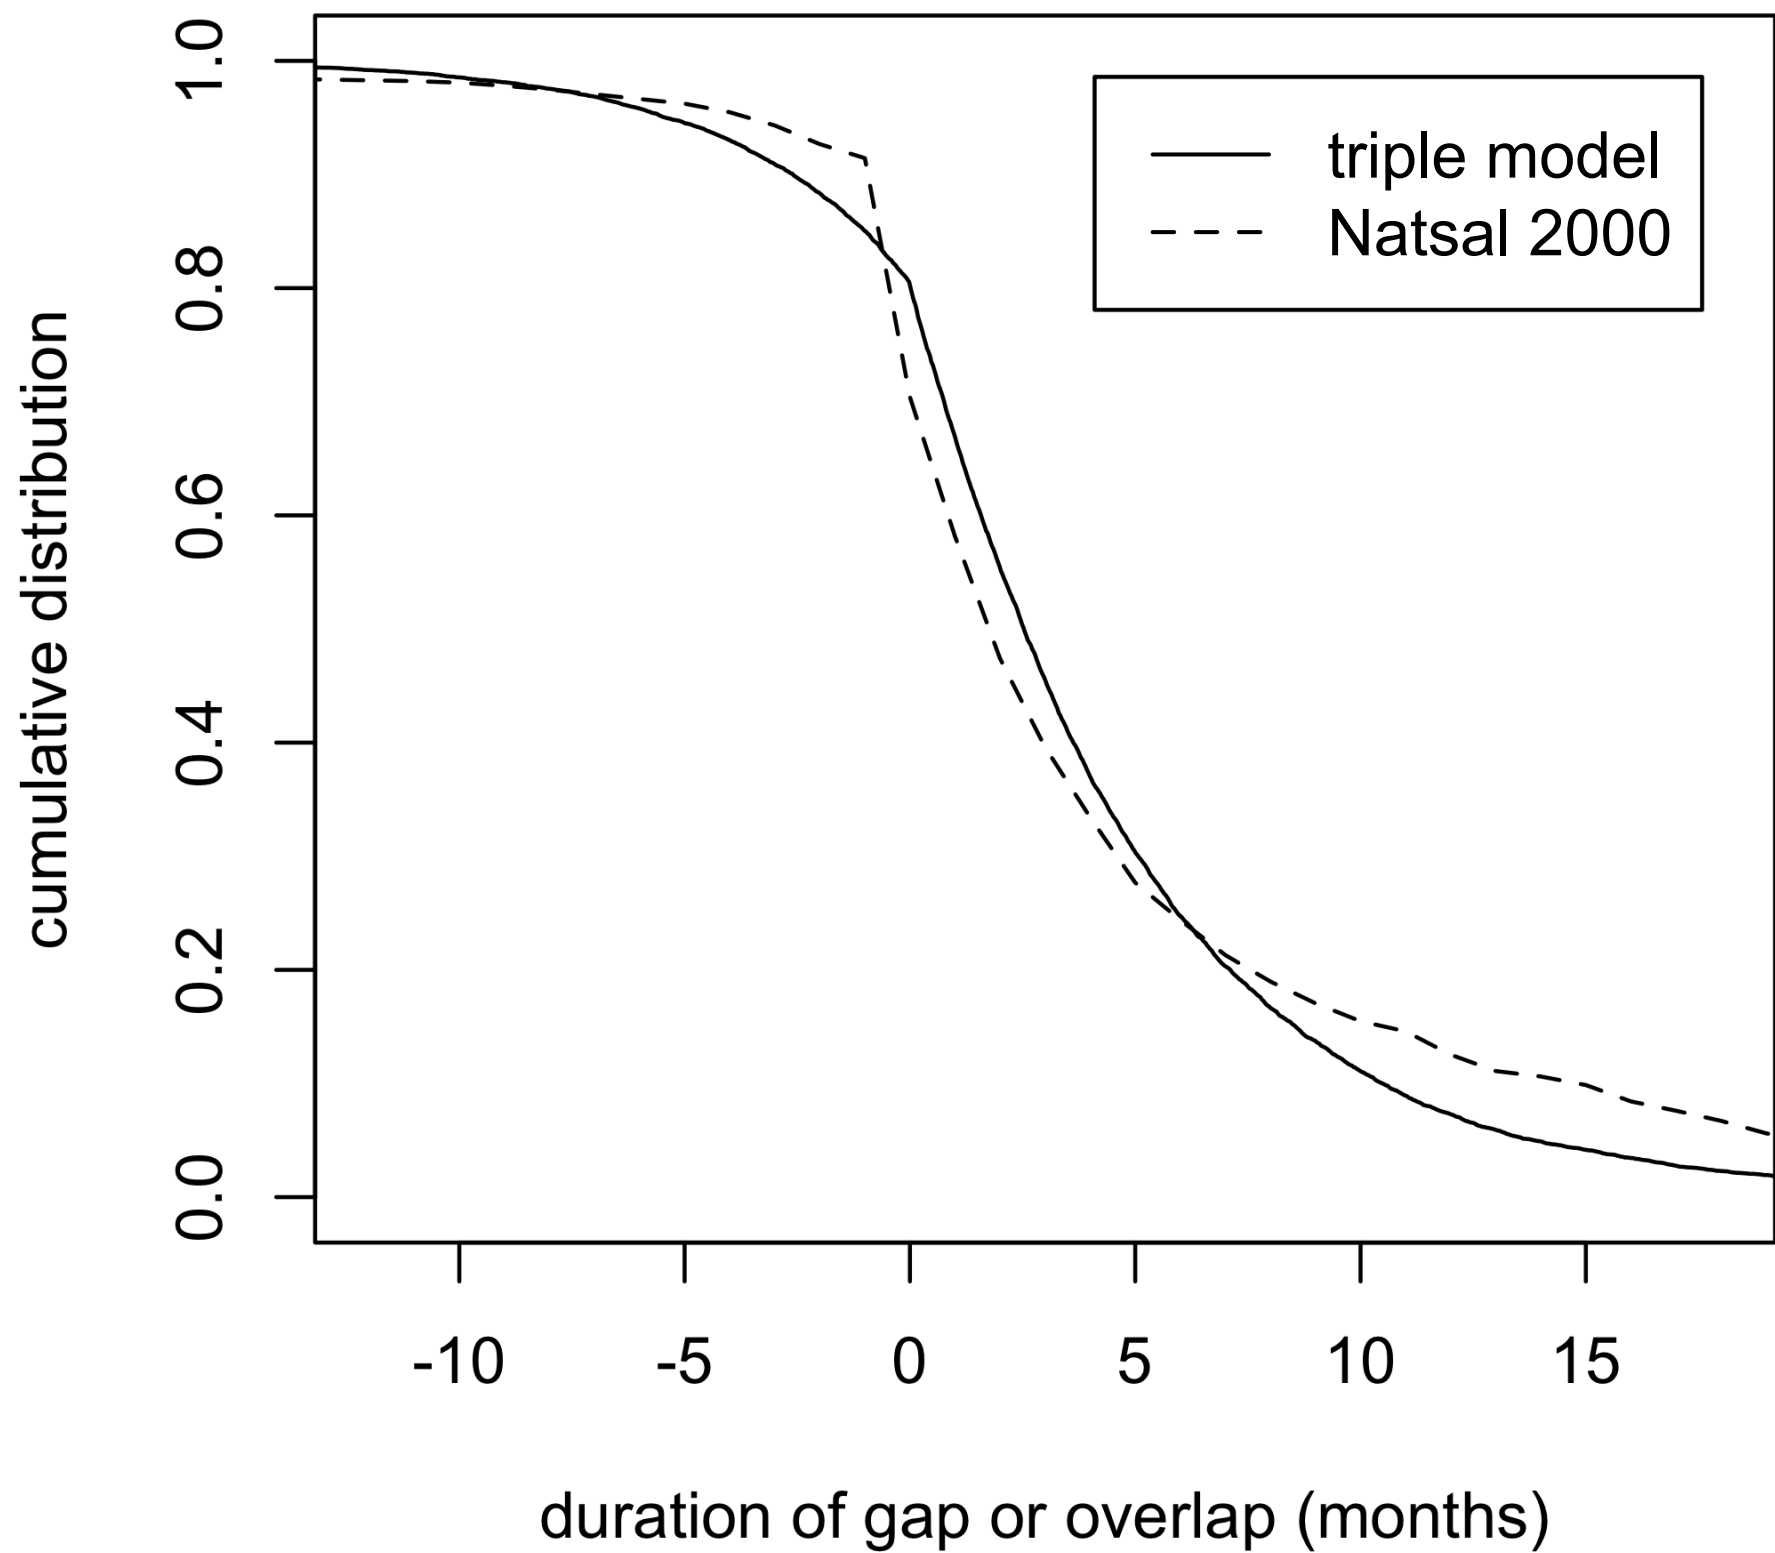

Supplement: pone.0051438.s001.pdf [file pone.0051438.s001.pdf]
